# Supplementary material for: Improved Analytical Approach for Determination of Tropane Alkaloids in Leafy Vegetables Based on µ-QuEChERS Combined with HPLC-MS/MS
Source: MDPI journal article supplement (doi:10.3390/toxins14100650), 2022-09-20
Supplement: s1 [file s1]

# Supplementary Materials: Improved Analytical Approach for Determination of Tropane Alkaloids in Leafy Vegetables Based on $\mu$ -QuEChERS Combined with HPLC-MS/MS

Lorena González-Gómez, Sonia Morante-Zarcero, Jorge A.M. Pereira, José S. Câmara and Isabel Sierra

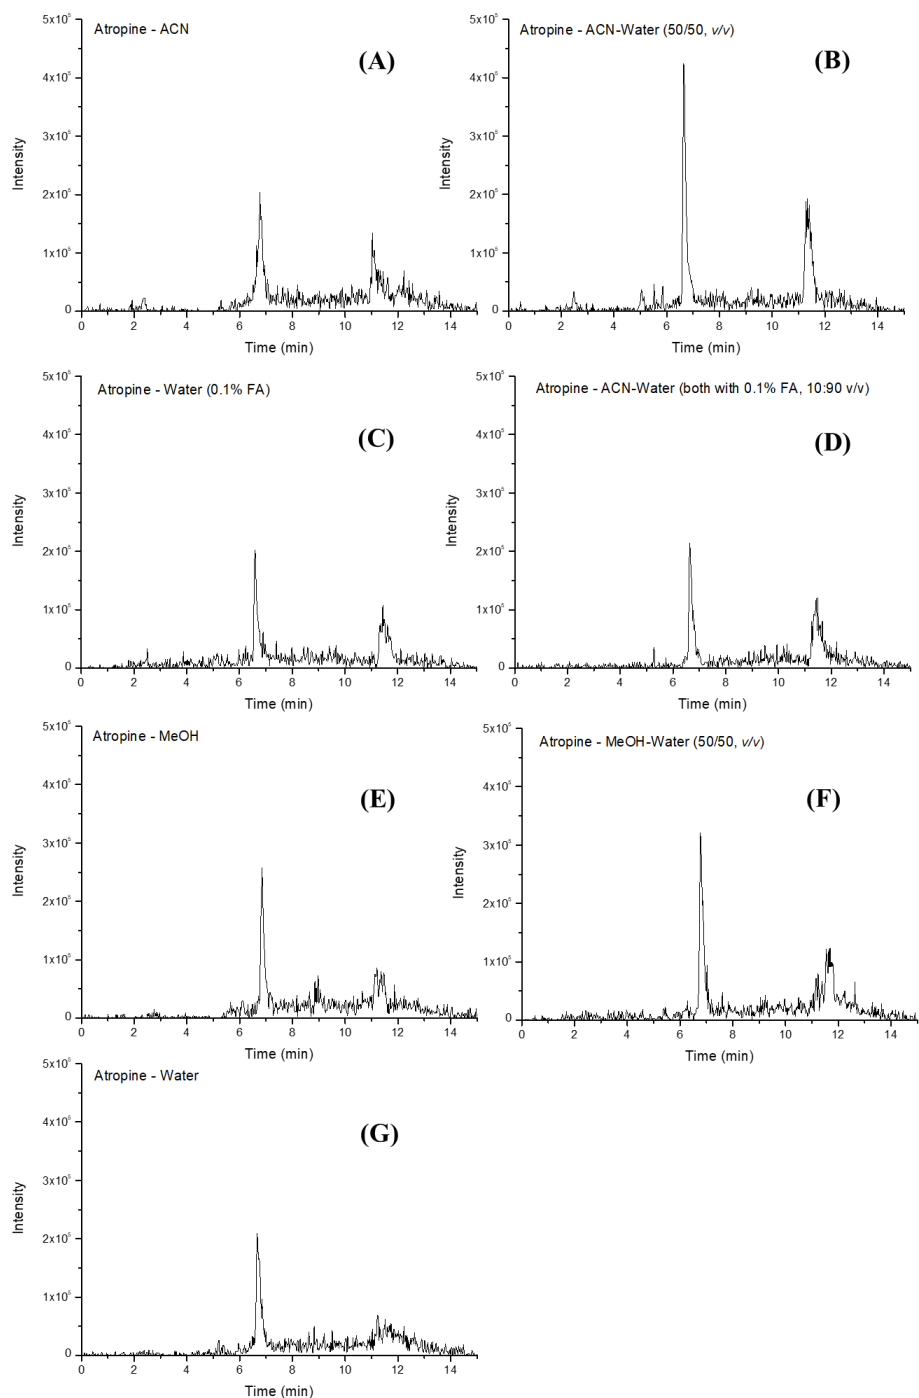

**Figure S1.** Chromatograms for a sample (Mix-1) spiked with 5 ng/g of atropine extracted and purified with the  $\mu$ -QuEChERS protocol and injected in different reconstitution solvents. **A:** ACN; **B:** ACN-Water (50/50, *v/v*); **C:** Water (0.1% FA); **D:** ACN-Water (both with 0.1% FA 10/90, *v/v*); **E:** MeOH; **F:** MeOH-Water (50/50, *v/v*); **G:** Water.

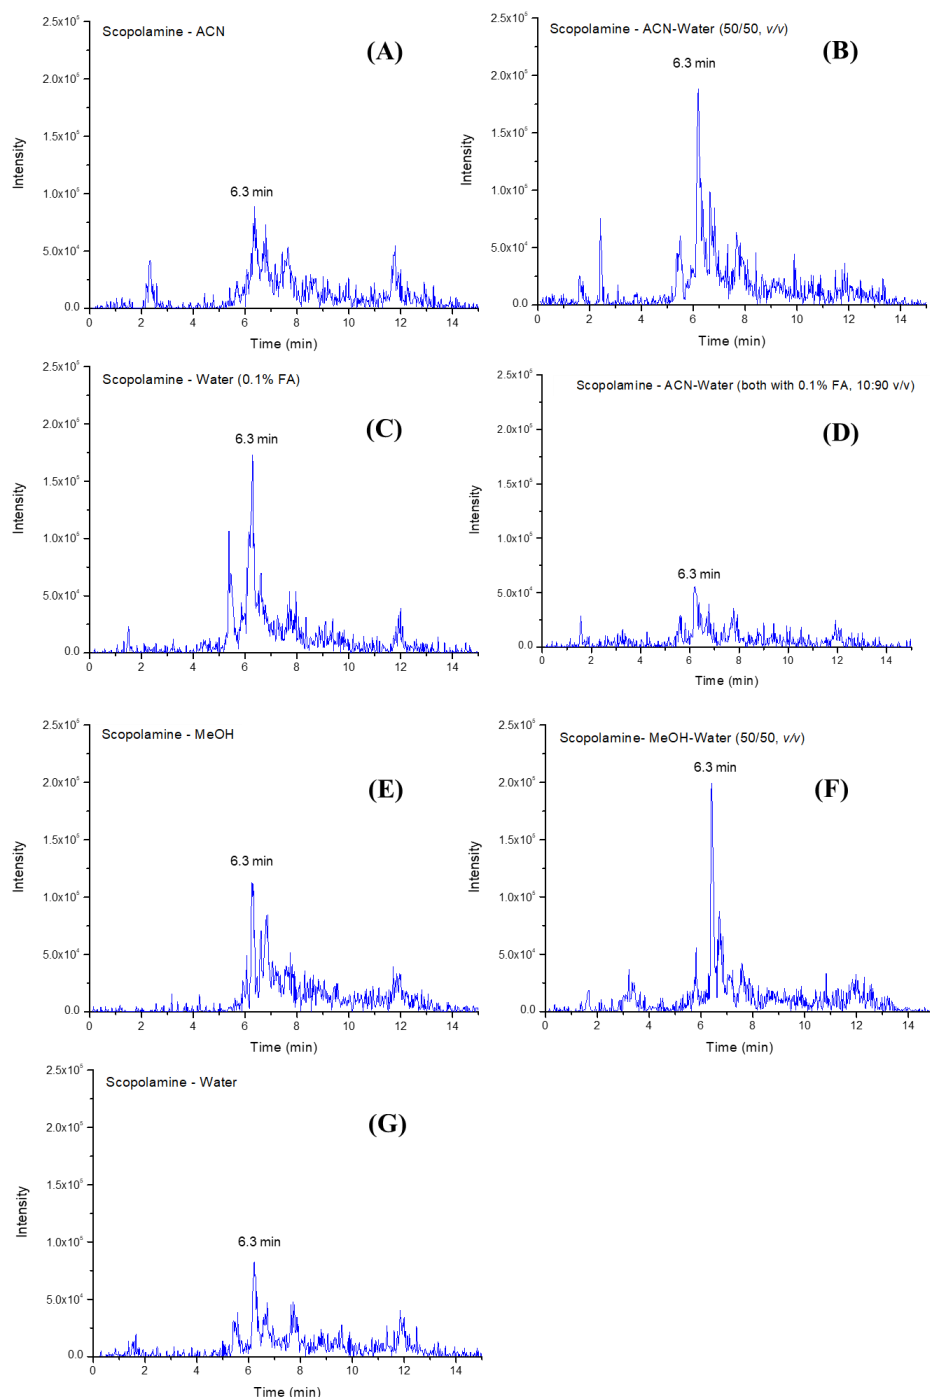

**Figure S2.** Chromatograms for a sample (Mix-1) spiked with 5 ng/g of scopolamine extracted and purified with the  $\mu$ -QuEChERS protocol and injected in different reconstitution solvents. **A:** ACN; **B:** ACN-Water (50/50,

---

*v/v*); **C**: Water (0.1% FA); **D**: ACN-Water (both with 0.1%, FA 10/90, *v/v*); **E**: MeOH; **F**: MeOH-Water (50/50, *v/v*); **G**: Water.

---
